# Supplementary material
Source: MDPI journal article supplement (https://www.mdpi.com/2227-9040/10/2/50)
Supplement: s1 [file s1]

## Supplementary Materials

### A New Method for Enantiomeric Determination of 3,4-Methylenedioxymethamphetamine and p-Methoxymethamphetamine in Human Urine

**Table S1.** Mobile phase gradient for HPLC.

| Step | Time<br>(min)* | Solvent A <sup>a</sup><br>(%) | Solvent B <sup>b</sup><br>(%) | Solvent C <sup>c</sup><br>(%) |                     |
|------|----------------|-------------------------------|-------------------------------|-------------------------------|---------------------|
| 1    | -60.0          | 100.0                         | 0.0                           | 0.0                           |                     |
| 2    | -30.0          | 100.0                         | 0.0                           | 0.0                           | Sample<br>injection |
| 3    | -0.1           | 100.0                         | 0.0                           | 0.0                           |                     |
| 4    | 0.0            | 0.0                           | 100.0                         | 0.0                           | Mass start          |
| 5    | 39.9           | 0.0                           | 100.0                         | 0.0                           |                     |
| 6    | 40.0           | 0.0                           | 0.0                           | 100.0                         | Linear              |
| 7    | 59.9           | 0.0                           | 0.0                           | 100.0                         |                     |
| 8    | 60.0           | 100.0                         | 0.0                           | 0.0                           |                     |

\*: negative time represent the time prior to the beginning of the mass monitor.

<sup>a</sup>: 50 mM ammonium acetate buffer pH 6.7.

<sup>b</sup>: 50 mM ammonium acetate buffer pH 5.6.

<sup>c</sup>: 50 mM ammonium acetate buffer pH 3.5.

**Figure S1**

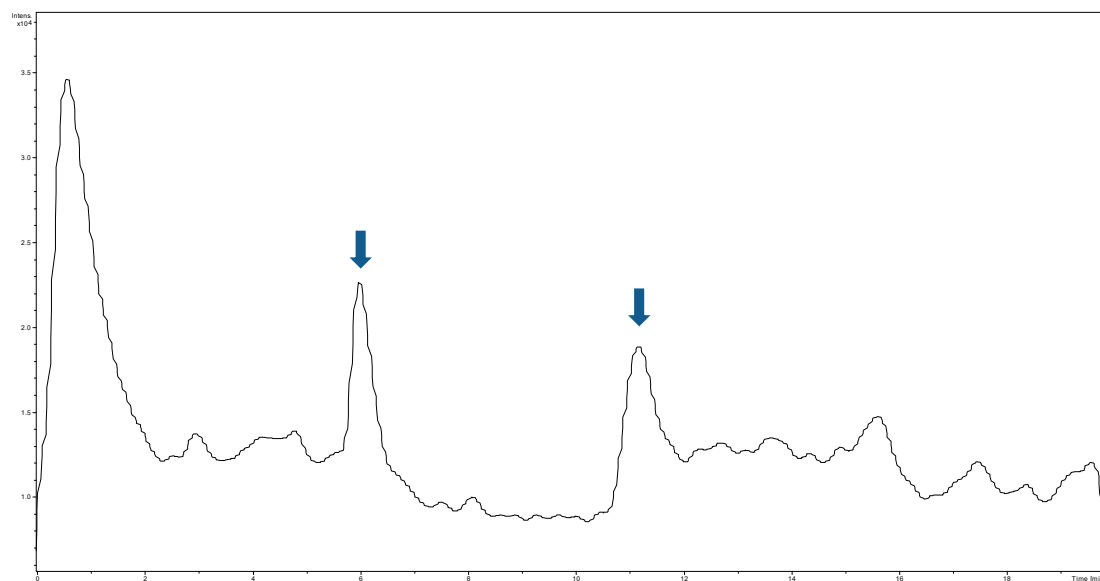

**Figure S1.** The TIC of a urine sample spiked with 500 ng/mL of racemic MA-d<sub>14</sub> and 1000 ng/mL each of racemic PMMA and MDMA

**Figure S2**

(A)

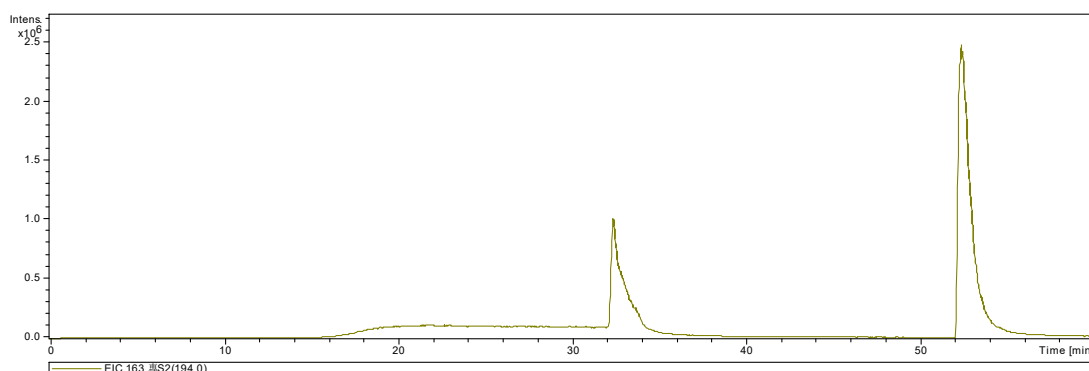

(B)

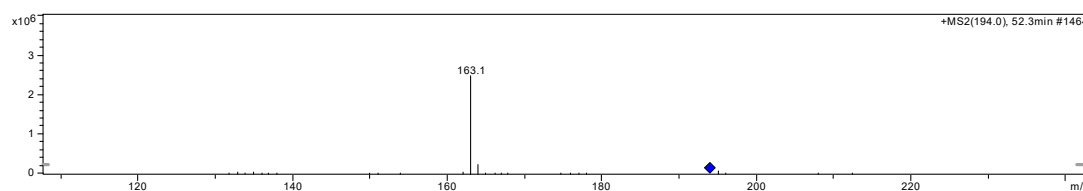

**Figure S2.** The immunoaffinity column and LC-MS equipment used in our previous research [19] was used to analyze a sample of racemic MDMA (0.10 mg/mL) in methanol. The EIC (m/z:194→163) obtained is shown in (A) and the MS<sup>2</sup> spectrum at the retention time of 52.3 min is shown in (B). Sample volume injected was 0.50  $\mu$ L. The flow rate of mobile phase is 0.40 mL/min.
